# Supplementary material for: Soluble Adenylyl Cyclase Regulates Bile Salt‐Induced Apoptosis in Human Cholangiocytes
Source: PubMed Central journal article supplement — Hepatology. 2016 Apr 15;64(2):522–34. doi: 10.1002/hep.28550 (PMC5111777; doi:10.1002/hep.28550), 2016-04-15
Supplement: HEP-64-522-s001.pdf [file HEP-64-522-s001.pdf]

**Figure S1**

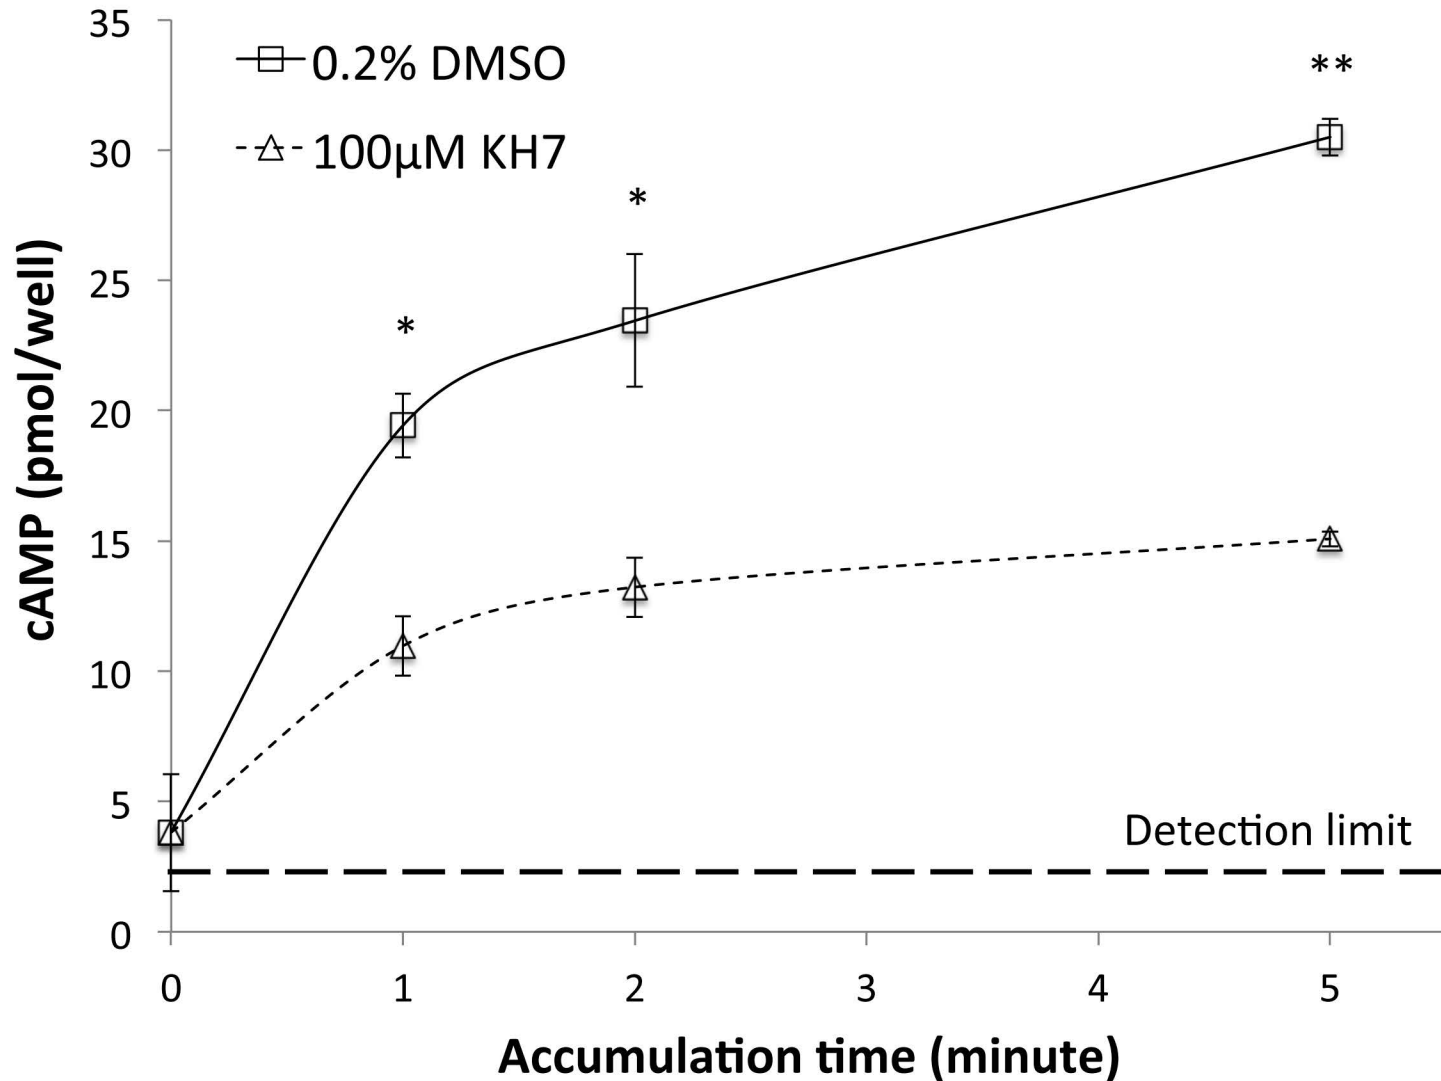

**Figure S2**

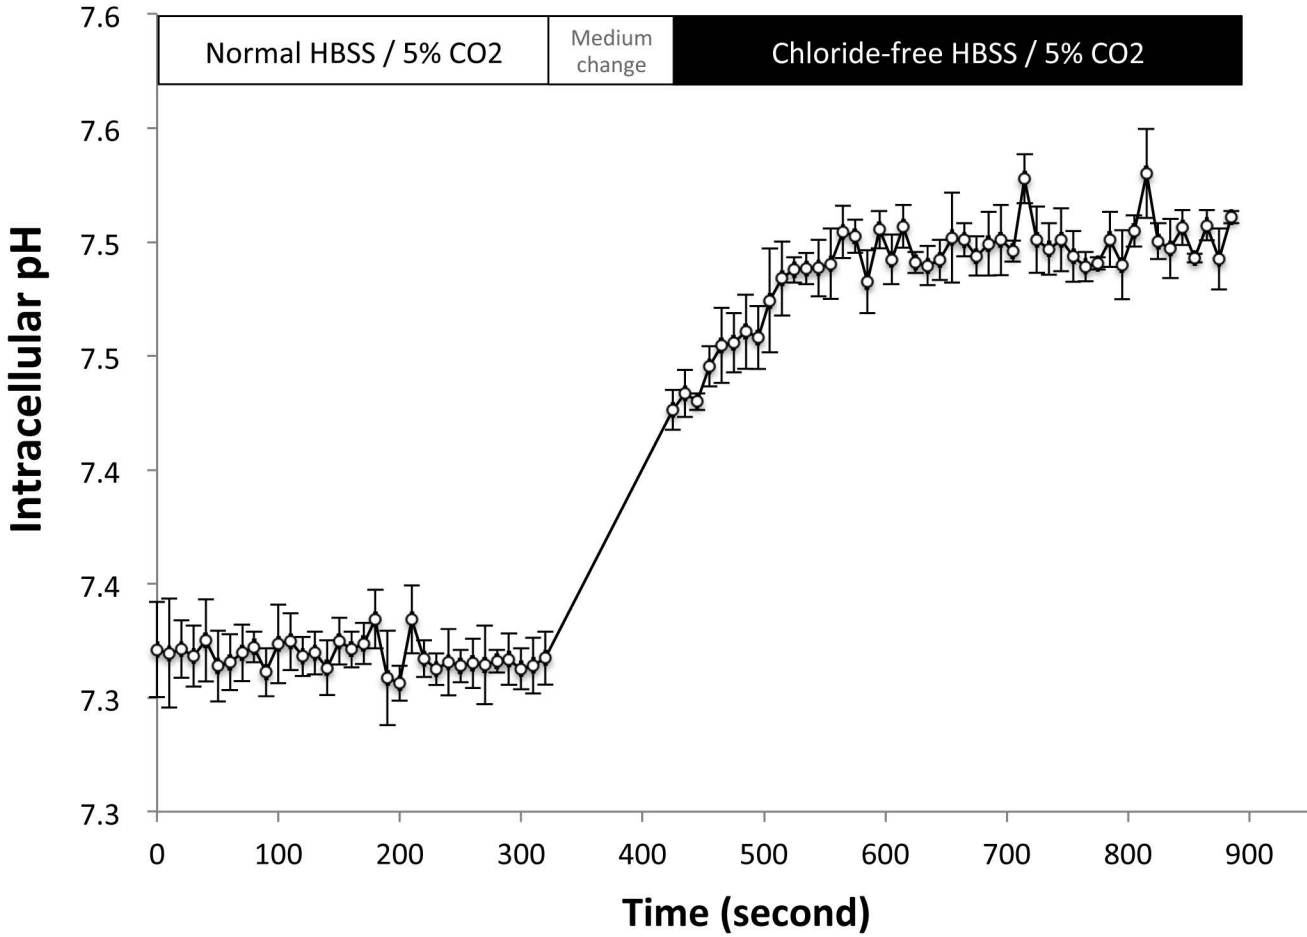

**Figure S3**

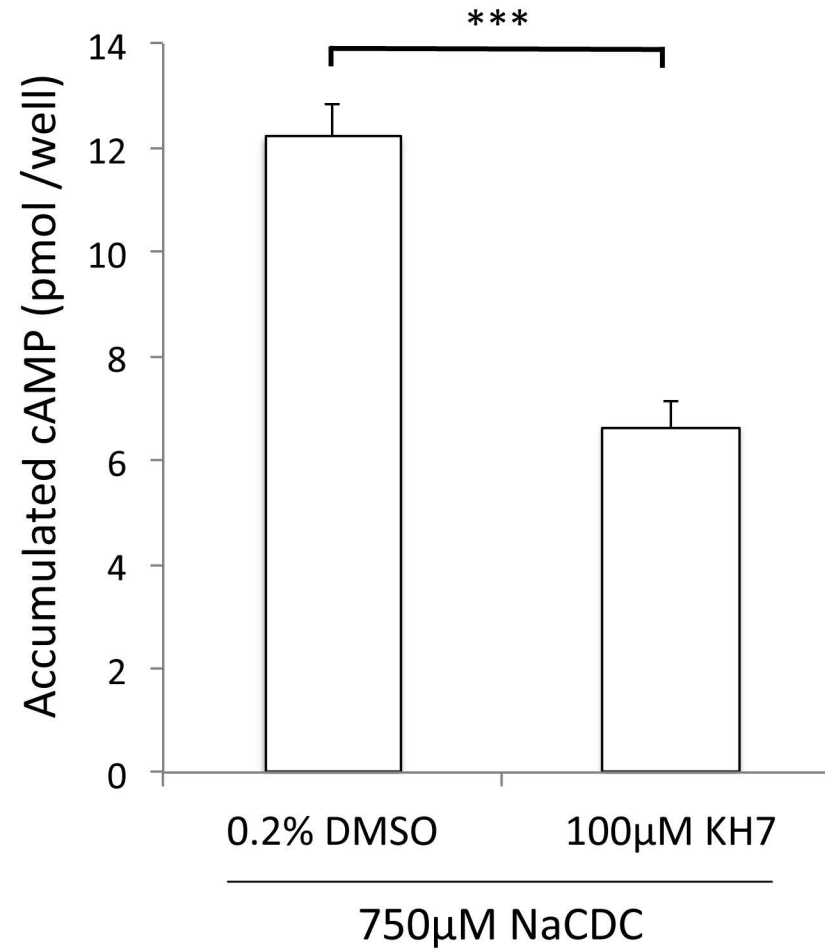

**Figure S4**

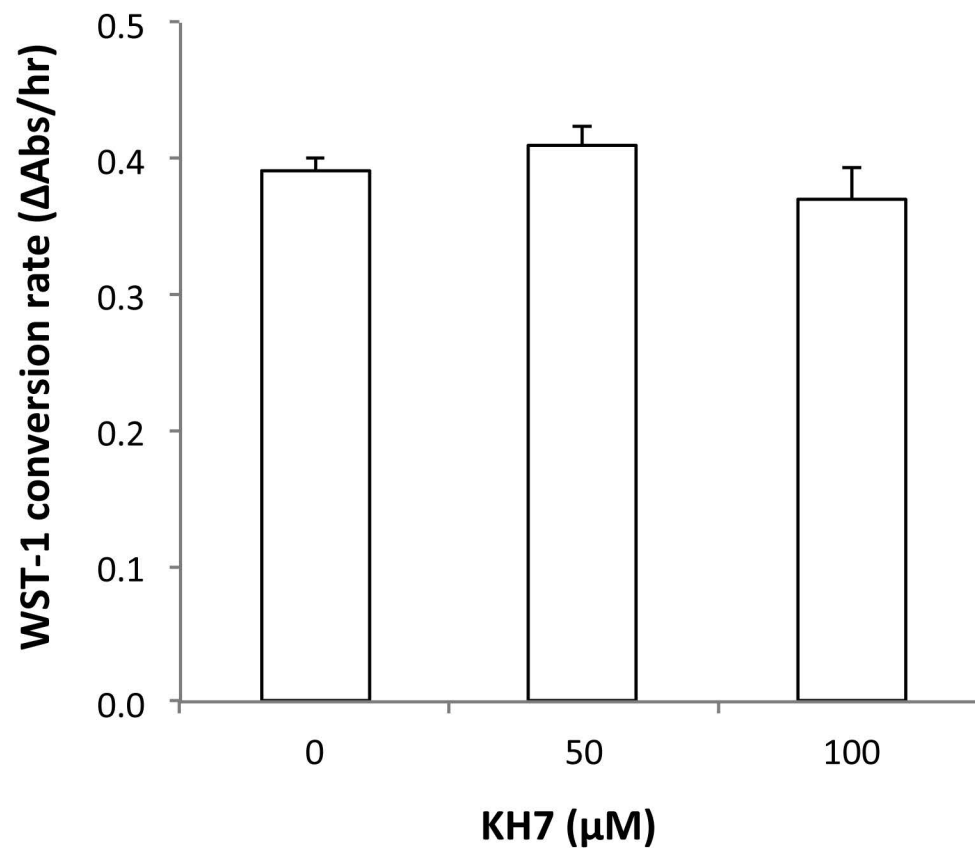

**Figure S5**

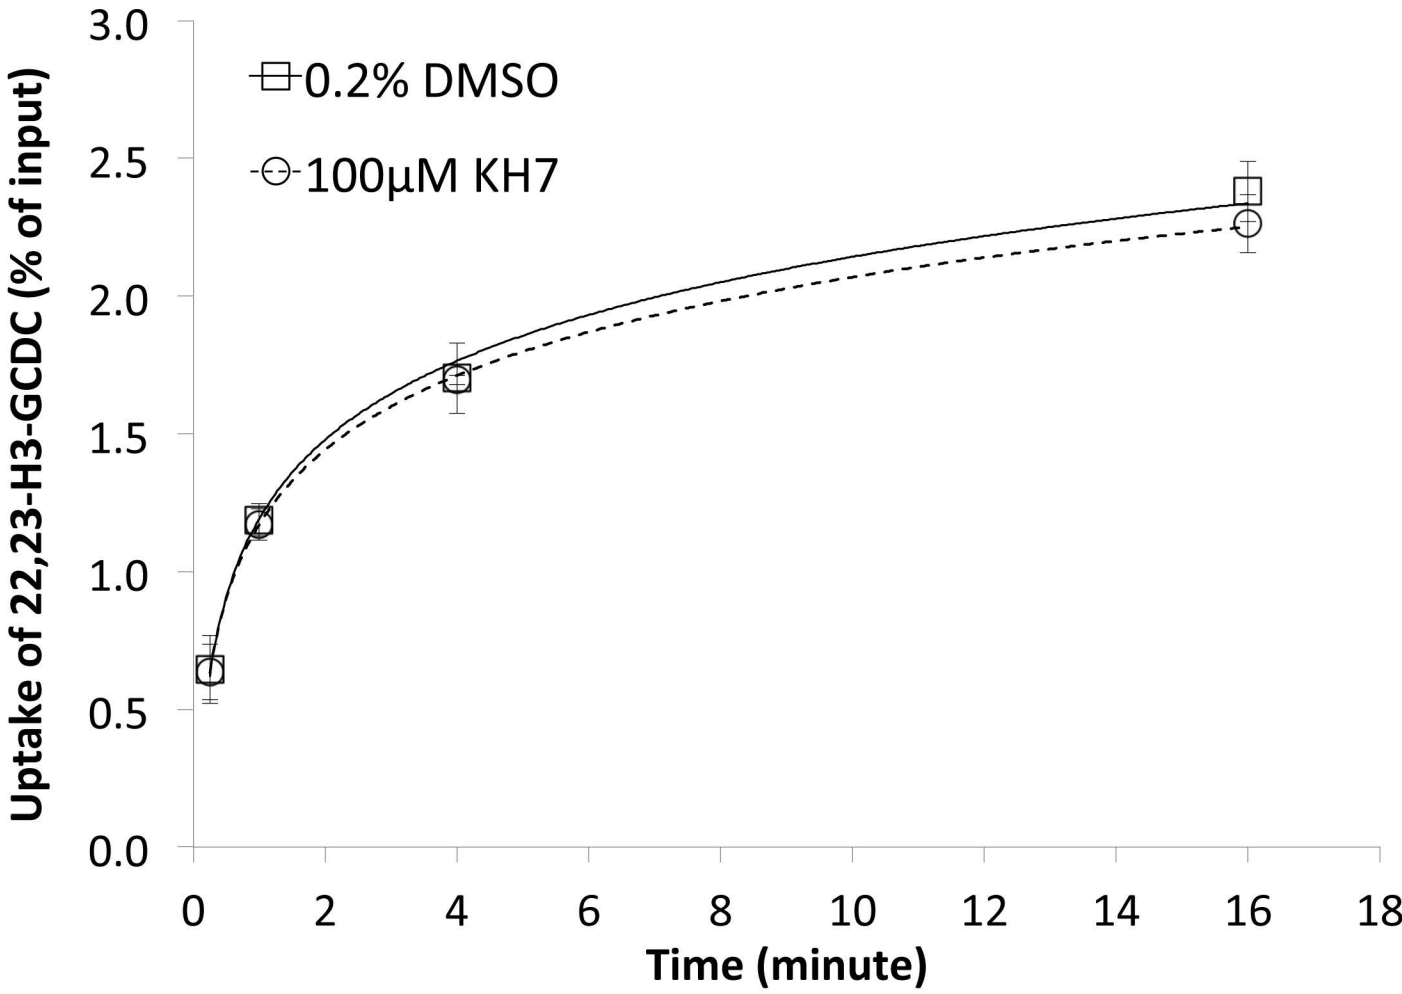

# Figure S6

0 $\mu$ M NaCDC + 0 $\mu$ M KH7

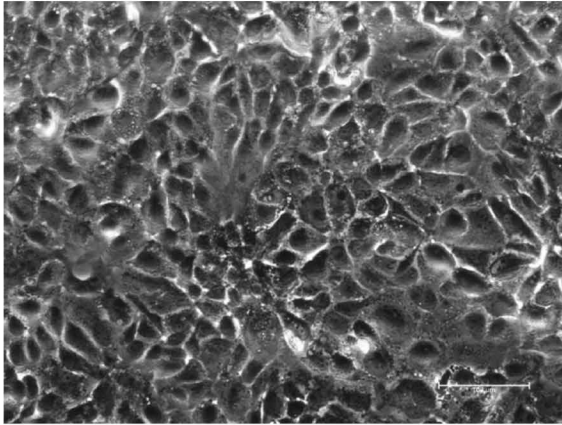

0 $\mu$ M NaCDC +100 $\mu$ M KH7

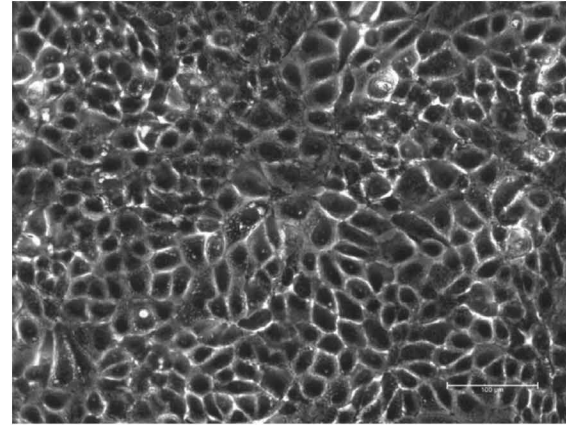

750 $\mu$ M NaCDC + 0 $\mu$ M KH7

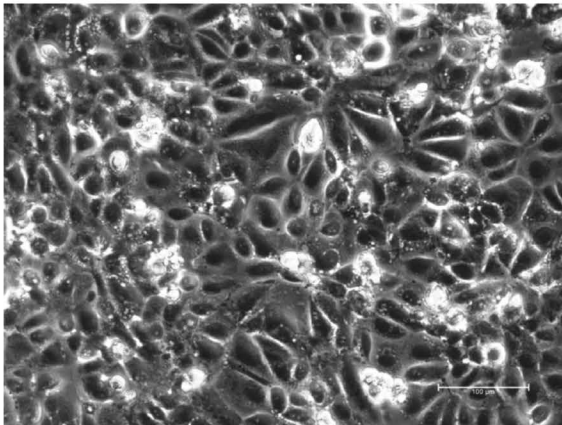

750 $\mu$ M NaCDC +100 $\mu$ M KH7

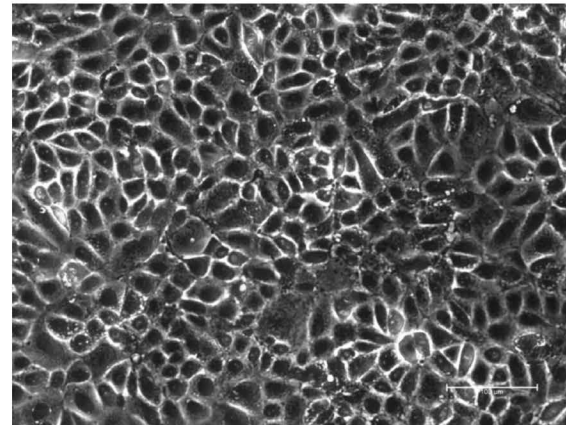

**Figure S7**

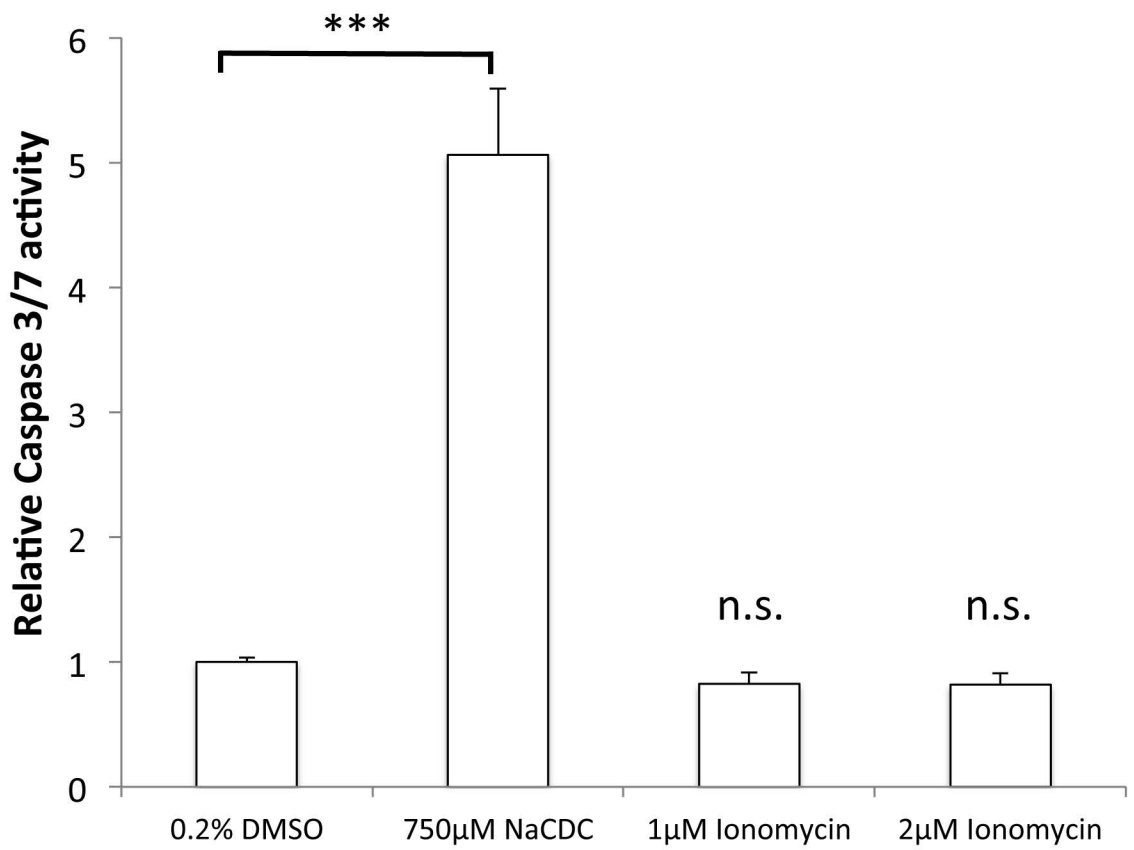

# Supplementary Methods

## ***cAMP accumulation assay***

To demonstrate bicarbonate responsiveness (Figure 1), confluent H69 cholangiocyte monolayers in 96-well plates were washed twice with Hank's balanced salt solution (HBSS) and incubated with bicarbonate-free HBSS in a 37°C water bath in ambient air for 30 minutes. Bicarbonate-free HBSS was aspirated and HBSS modified for 5% CO<sub>2</sub> with or without chloride was added (see *Supplementary Table 1* for formulation of modified HBSS), with 50µM KH7 or vehicle, in the presence of 250µM 3-isobutyl-1-methylxanthine (IBMX), a pan-phosphodiesterase inhibitor. Cells were incubated in 5% CO<sub>2</sub> stove for 30 minutes. Total cAMP was assayed with cAMP Direct Biotrak EIA kit (GE healthcare Life Sciences) according to the instruction manual. Results were corrected for protein content of individual wells by bicinchoninic acid (BCA) assay. For sAC activity in resting state (Figure S1) or during bile salt treatment (Figure S3), H69 cholangiocytes were cultured in 24-well plates. Experiments were performed in DMEM with 10% FBS. cAMP accumulated in the presence of 500µM IBMX for 2 minutes and stopped by 0.1M HCl and 1% Triton X-100.



cAMP was measured by Direct cAMP ELISA kit (Enzo Life Sciences).

### ***Caspase 3/7 activity assay***

Confluent H69 cholangiocyte monolayers in 96-well plates were treated with sodium chenodeoxycholate and KH7 in either normal DMEM or calcium-free DMEM (USBiological) supplemented with 1.5g/L sodium bicarbonate and 20mM HEPES-NaOH (pH 7.4) at 37°C in a 5% CO<sub>2</sub> incubator. Calcium-free DMEM was supplemented with 0.5mM EGTA to chelate the free Ca<sup>2+</sup> in FBS. Apoptosis induced by sodium glycochenodeoxycholate was performed in DMEM supplemented with 0.375g/L sodium bicarbonate and 20mM HEPES-NaOH (pH6.8) in at 37°C in a 5% CO<sub>2</sub> incubator. Primary mouse cholangiocytes were cultured for 1 week on thick collagen gel in 96-well plate. Cells were treated with sodium chenodeoxycholate and KH7 (Tocris Bioscience) under identical conditions as the H69 cells. Caspase 3/7 activity was measured with artificial peptide substrate (Ac-DEVD)<sub>2</sub>-Rh110 by SensoLyte Homogeneous Rh110 Caspase 3/7 Assay Kit (AnaSpec Inc., Fremont, CA) according to instruction manual. The kinetics of fluorophore

Rh110 release, as a result of cleavage by caspase 3 and caspase 7, was measured by NOVOstar microplate reader (BMG Labtech GmbH, Offenburg, Germany) at  $\lambda_{\text{ex}} / \lambda_{\text{em}} = 480 / 510$  nm. The slope in the linear window of the kinetic reading was calculated and defined as the caspase 3/7 activity. For experiments involving different cell lines, caspase 3/7 activities were normalized to protein content in a parallel plate by BCA assay.

### ***Cell fractionation for cytochrome c release and Bax translocation assays***

All solutions used were ice-cold. Confluent monolayers of H69 in 6-well plate were washed twice with phosphate-buffered saline. Monolayers were permeabilized with 50 $\mu$ g/mL digitonin in 400 $\mu$ L intracellular buffer (ICB: 120mM KCl, 10mM NaCl, 0.5mM KH<sub>2</sub>PO<sub>4</sub>, 1.5mM MgSO<sub>4</sub>, 5mM Na<sub>2</sub>-succinate, 20mM HEPES-KOH, pH 7.4) supplemented with 2mM EGTA, 1mM DTT and cOmplete EDTA-free protease inhibitor cocktail (Roche). Plates were incubated on orbital shaker at 100 rpm for 15 minutes at 4°C. The supernatants were harvested as the cytosolic fraction and the permeabilized monolayers were immediately gently washed twice with 1mL ICB and lysed

with 400µL RIPA buffer (150mM NaCl, 1% (w/v) Triton X-100, 0.5%(w/v) sodium deoxycholate, 0.1% SDS, 20mM Tris-HCl, pH 8.0) supplemented with 5mM EDTA and protease inhibitor cocktail. The digitonin-permeabilized cell layers contained intact mitochondria, nuclei and plasma membrane, and was used here as the mitochondrial fraction. Equal volume of cytosolic and mitochondrial fractions were subjected to SDS-PAGE and immunoblotting.

### ***Intracellular Ca<sup>2+</sup> chelation by BAPTA***

H69 cholangiocyte monolayers in 96-well plates were washed twice with FBS-free DMEM and incubated with 2.5µM, 5µM, or 10µM BAPTA-AM (Molecular Probes) in FBS-free DMEM at 37°C in a 5% CO<sub>2</sub> incubator for 30 minutes. BAPTA-AM was dissolved in DMSO and an equivalent amount of DMSO (0.1%) was added to the control incubations. Monolayers were then washed twice with FBS-free DMEM and treated with 750µM sodium chenodeoxycholate for 1 hour. Caspase 3/7 activity was measured as described above. 糲

糲

### ***Lentiviral transduction for shRNA-mediated knockdown***

Lentiviral constructs for shRNA-mediated knockdown of were obtained from MISSION<sup>®</sup> TRC shRNA library (Sigma-Aldrich, St. Louis, MO): AE2

(TRCN0000043862), MCU (TRCN0000133861), shRNA control (SHC002).

Production of Lentivirus was performed as described previously<sup>1</sup>. Stable knockdown H69 cholangiocytes cell lines were made by Lentiviral transduction and selected with 2.5µg/mL puromycin. All transformants used in experiments were polyclonal.

### ***Cloning of tetracycline inducible sAC knockdown vector***

Tet-pLKO-puro was a gift from Dmitri Wiederschain (Addgene plasmid # 21915). Target sequence for sAC was generated at The RNAi Consortium (TRC) public portal (<http://www.broadinstitute.org/rnai/public/seq/search>).

Cloning of shRNA expressing vectors was performed as previously described<sup>2</sup>.

Briefly, Tet-pLKO-puro was digested with *AgeI* and *EcoRI* and gel purified.

Sense and anti-sense oligo's for sAC and SHC (*Supplementary Table 2*) were

annealed and ligated into the open vector. Lentivirus production and transduction were performed as described above.

### ***RNA isolation, reverse transcription and real-time quantitative PCR***

#### ***(RT-qPCR)***

H69 cholangiocytes were cultured in 6-well plate until confluent. Total RNA was isolated using TriPure Isolation Reagent (Roche) or TRI Reagent (Sigma).

2µg total RNA was treated with DNase I (Promega) and then reversely

transcribed into cDNA with 5 pmole of gene-specific primer and 100U

RevertAid reverse transcriptase (Thermo Scientific) in a reaction volume of

20µL. cDNA was diluted with water to 100µL. 2µL of diluted cDNA were used

as template for RT-qPCR using SYBR Green I Master (Roche) or SensiFAST

SYBR No-ROX kit (Bioline). Initial fluorescent values were calculated by

LinRegPCR<sup>3</sup> (version 2013.0, Academic Medical Center, Amsterdam).

Expression levels were normalized to reference gene *36B4*. Please refer to

*Supplementary Table 3* for primer sequences used in reverse transcription and

RT-qPCR.

### ***WST-1 viability assay***

Viability of H69 cholangiocytes after sAC inhibition by KH7 was determined by conversion of WST-1 to formazan. Confluent H69 cholangiocyte monolayers in 96-well plates were incubated with 0, 50, or 100 $\mu$ M KH7 in culture medium for 1 hour. Monolayers were washed twice with culture medium and incubated with WST-1 (Roche, 1:10 dilution in culture medium) for one hour in 5% CO<sub>2</sub> incubator. Empty wells with WST-1 served as blank. Absorbance at 450nm (formazan) and 690nm (reference wavelength) was measured by Synergy HT Multi-Mode Microplate Reader (BioTek) every 30 minutes for 2 hours. The conversion rate was calculated from the slope.

### ***DNA fragmentation assay***

Isolation of fragmented genomic DNA was performed as described by Herrmann et al<sup>4</sup> with modification. Confluent H69 cholangiocyte monolayers were treated with 750 $\mu$ M sodium chenodeoxycholate and increasing concentrations of KH7 for 1 hour at 37°C in 5% CO<sub>2</sub> incubator. Media were

harvested and centrifuged at 20,000g to pellet apoptotic bodies. The attached cells were harvested by adding 285µL lysis buffer (1% NP-40, 20mM EDTA, 50mM Tris-HCl, pH 8.0) and pooled with the apoptotic body pellets. Fifteen µL 10% SDS and 3µL proteinase K (20mg/mL in 20mM CaCl<sub>2</sub>, 50% glycerol and 10mM Tris-HCl, pH 7.5) were added to the lysates and incubated for 48 hours in a 37°C water bath with shaking. Proteinase K was then heat-inactivated at 75°C for 15 minutes before digesting RNA with 2µL RNase A (1mg/mL in water) at 37°C overnight. To precipitate protein, 100µL 10M ammonium acetate was added and the mixture centrifuged at 20,000g for 20 minutes. The supernatants (300µL) were harvested and DNA was precipitated by adding 2.5 volumes of ethanol and centrifuged at 20,000g for 10 minutes. The DNA pellets were washed once with 1mL 80% ethanol, dried by heating at 55°C for 10 minutes, dissolved in 25µL DNA loading buffer with 0.1% SDS and resolved on a 1.5% agarose gel.

### ***Membrane protein extraction***

Control and AE2 knockdown H69 cholangiocytes were cultured on 60 mm

culture dish until confluent. Confluent monolayers were permeabilized with 1.2mL 50µg/mL digitonin in intracellular buffer (ICB: 120mM KCl, 10mM NaCl, 0.5mM KH<sub>2</sub>PO<sub>4</sub>, 1.5mM MgSO<sub>4</sub>, 5mM Na<sub>2</sub>-succinate, 20mM HEPES-KOH, pH 7.4) supplemented with 2mM EGTA, 1mM DTT and cOmplete EDTA-free protease inhibitor cocktail (Roche). Plates were incubated on orbital shaker at 100 rpm for 15 minutes at 4°C. Supernatants were discarded. The permeabilized monolayers were immediately washed once with 3mL ice-cold ICB and collected in 1mL ICB by scraping. The homogenates were centrifuged at 20,000g, 4°C for 10 minutes. Supernatants were discarded and the pellets extracted with 0.45% (w/v) NP-40 in ICB for 15 minutes on ice and centrifuged again at 20,000g, 4°C for 10 minutes. The supernatants containing the extracted membrane protein from both plasma membrane and organelles were subjected to SDS-PAGE and immunoblotting.

### ***SDS-PAGE and Immunoblotting***

Except for cytochrome c release and Bax translocation assay, whole cell lysates in RIPA buffer or membrane protein extracts were quantified by BCA



assay. Equal amounts of protein (40 to 50µg per lane) were subjected to SDS-PAGE, transferred to PVDF membranes by semi-dry blotting and blocked overnight in 5% non-fat milk / PBST (phosphate-buffered saline with 0.05% (w/v) Tween 20) at 4°C. For immunodetection, the PVDF membranes were incubated with primary antibody for 1 hour, washed 3 times with TBST (Tris-buffered saline with 0.05% (w/v) Tween 20), incubated with horseradish peroxidase-conjugated secondary antibody for 1 hour, washed again 3 times with TBST. All antibodies were diluted in 1% non-fat milk-TBST and incubation was performed at room temperature. The PVDF membrane was developed with homemade enhanced chemiluminescence reagents (100mM Tris-HCl pH 8.5, 1.25mM luminol, 0.2mM p-coumarin and freshly added 3mM H<sub>2</sub>O<sub>2</sub>) and detected by ImageQuant LAS 4000 (GE Healthcare Life Sciences).

Densitometry was performed by software ImageJ<sup>5</sup>. Please refer to *Supplementary Table 4* for the list of primary antibodies and dilution.

### ***Intracellular pH measurement by***

#### ***2',7'-Bis-(2-Carboxyethyl)-5-(and-6)-Carboxyfluorescein (BCECF)***

H69 human cholangiocytes were cultured in 96-well black plate with clear bottom (Corning, Costar 3606) until confluence. Normal and chloride-free HBSSs for 5% CO<sub>2</sub> were equilibrated overnight in 5% CO<sub>2</sub>, 37°C incubator and pH confirmed on day of experiment to be 7.4. H69 monolayers were loaded with 5µM BCECF•AM in bicarbonate-free HBSS at room temperature for 45 minutes. Excessive dye was removed and incubated for additional 30 minutes in bicarbonate-free HBSS at room temperature. Cells were refreshed with HBSS modified for 5% CO<sub>2</sub> and incubated at 37°C, 5% CO<sub>2</sub> in CLARIOstar (BMG LABTECH, Ortenberg, Germany) under atmospheric control. Medium was refreshed again before assay started. Duo-excitation ratiometric fluorescence of BCECF was measured every 2 minutes at  $\lambda_{ex}/\lambda_{em}=440/535$  and  $490/535$  nm. After signals stabilized, measurement was paused and medium replaced by chloride-free HBSS for 5% CO<sub>2</sub>. Fluorescence measurement was resumed and continued until signals were stable. To

calibrate, cells were incubated in high potassium buffer (140.85 mM KCl, 1.27 mM CaCl<sub>2</sub>, 0.81 mM MgSO<sub>4</sub>, 0.44mM KH<sub>2</sub>PO<sub>4</sub>, 0.34mM K<sub>2</sub>HPO<sub>4</sub>, 5.55mM glucose, 30mM HEPES) with 10μM Nigericin (Cayman Chemical) and pH titrated to 5.59, 6.32, 6.90, 7.39, 7.75, 7.86 and 7.91 by 5M KOH.

Fluorescence of unloaded cells was recorded for background correction. After background correction, Fluorescence ratios ( $R = F_{490/535} / F_{440/535}$ ) were calculated. Standard curve was fitted to the equation

$\text{pH} = \text{p}K_a + C \cdot \log[(R - F_{\min}) / (F_{\max} - R)]$  by least square regression using Solver

Add-in in Microsoft Excel Spreadsheet<sup>6</sup>.  $\text{p}K_a$ ,  $C$ ,  $F_{\min}$  and  $F_{\max}$  were fitted to be 7.221, 0.988, 0.349 and 1.742 respectively.  $R^2$  of the fitted curve is 0.9999.

### ***Bile salt uptake assay***

Bile salt uptake assay was performed with H69 cholangiocyte monolayer in 24-well plate at 37°C in ambient air. H69 monolayers were equilibrated for 15 minutes with bicarbonate-free HBSS supplemented with 20mM HEPES-NaOH, pH 7.4 for 15 minutes. Medium was removed and 200μL HEPES-buffered bicarbonate-free HBSS with 22,23-<sup>3</sup>H-GCDC (a generous gift from Dr. Alan F.

Hofmann. Average total activity per well  $\approx$  2.87 kBq.) and 750 $\mu$ M unlabeled NaGCDC. Bile salts were removed after 0.25, 1, 4 and 16 minutes.

Monolayers were washed twice with ice-cold HBSS and lysed in 200 $\mu$ L RIPA buffer. Radioactivity of the RIPA lysates was detected by liquid scintillation counter Tri-carb 2900TR (Perkin Elmer, Groningen, The Netherlands). Results were normalized to total input activity.

### ***Morphological study of apoptosis***

H69 cholangiocytes were treated with (combinations of) sodium chenodeoxycholate, KH7 and pan-caspase inhibitor Q-DV-OPh for 1 hour at 37°C and 5% CO<sub>2</sub>. Overnight treatment with 50 $\mu$ M etoposide served as positive control. Cells were fixed with 4% paraformaldehyde in PBS at room temperature for 15 minutes. Apoptotic blebbing was studied by phase contrast microscopy on a DMI8 microscope (Leica). To visualize nuclear morphology, cells were permeabilized with 0.1% Triton X-100 for 15 minutes, mounted in Vectashield / 4',6-diamidino-2-phenylindole (Vector Laboratories) and imaged on a DMI8 microscope (Leica).

### ***Isolation and culture of primary mouse cholangiocytes***

Primary mouse cholangiocytes were isolated from a 10-week old C57BL/6J wild type female mouse<sup>7, 8</sup>. Animal experiment was approved by institutional animal experiment committee. Briefly, the mouse was anesthetized with FFD mix (11.76mg/kg fluanisone, 0.37mg/kg fentanyl citrate and 5.88mg/kg diazepam) and perfused via portal vein first with Hanks A solution (120mM NaCl, 5mM KCl, 0.4mM KH<sub>2</sub>PO<sub>4</sub>, 0.2mM Na<sub>2</sub>HPO<sub>4</sub>, 2.5mM EGTA, 25mM NaHCO<sub>3</sub>, pre-equilibrated with 5% CO<sub>2</sub>, 95% O<sub>2</sub> carbogen) supplemented with 4U/mL heparin and subsequently Hanks B solution (120mM NaCl, 5mM KCl, 0.4mM KH<sub>2</sub>PO<sub>4</sub>, 0.2mM Na<sub>2</sub>HPO<sub>4</sub>, 25mM NaHCO<sub>3</sub>, 0.4mM MgSO<sub>4</sub>, 0.5mM MgCl<sub>2</sub> and 3mM CaCl<sub>2</sub>, pre-equilibrated with 5% CO<sub>2</sub>, 95% O<sub>2</sub> carbogen) supplemented with 0.25mg/mL type IV collagenase and 5µg/mL soybean trypsin inhibitor. The Glisson's capsule and digested liver parenchyma were removed carefully, leaving the intact intrahepatic biliary tree. The biliary tree was then finely minced and digested in 37°C water bath with shaking in DMEM/F-12 medium with 1mg/mL bovine serum albumin, 0.25mg/mL type IV

collagenase, 0.34mg/mL pronase, 0.06mg/mL DNase, 100U/mL penicillin and 100µg/mL streptomycin. The digested tissues were serial filtered through 100µm and 40µm Falcon cell strainers (BD biosciences). The trapped fractions were digested in DMEM/F-12 medium with 1mg/mL bovine serum albumin, 0.25mg/mL type IV collagenase, 0.26mg/mL hyaluronidase, 0.06mg/mL DNase, 100U/mL penicillin and 100µg/mL streptomycin and serial filtered through 100µm and 40µm filters. The fraction trapped by the 40µm cell strainer was collected, washed 5 times with phosphate-buffered saline and cultured on a thick collagen gel made of type I collagen from rat tail (Corning, #354236) in the described full hormone-supplemented medium<sup>9</sup>.

# 1 Supplementary Reference

2

3

## Reference List

4

- 5 1. Seppen J, Rijnberg M, Cooreman MP, et al. Lentiviral vectors for  
6 efficient transduction of isolated primary quiescent hepatocytes. *J*  
7 *Hepatol* 2002;36:459-65.
- 8 2. Wiederschain D, Wee S, Chen L, et al. Single-vector inducible  
9 lentiviral RNAi system for oncology target validation. *Cell Cycle*  
10 2009;8:498-504.
- 11 3. Ramakers C, Ruijter JM, Deprez RH, et al. Assumption-free analysis  
12 of quantitative real-time polymerase chain reaction (PCR) data.  
13 *Neurosci Lett* 2003;339:62-6.
- 14 4. Herrmann M, Lorenz HM, Voll R, et al. A rapid and simple method for  
15 the isolation of apoptotic DNA fragments. *Nucleic Acids Res*  
16 1994;22:5506-7.
- 17 5. Schneider CA, Rasband WS, Eliceiri KW. NIH Image to ImageJ: 25  
18 years of image analysis. *Nat Methods* 2012;9:671-5.
- 19 6. Brown AM. A step-by-step guide to non-linear regression analysis of  
20 experimental data using a Microsoft Excel spreadsheet. *Comput*  
21 *Methods Programs Biomed* 2001;65:191-200.
- 22 7. Salas JT, Banales JM, Sarvide S, et al. Ae2a,b-deficient mice develop  
23 antimitochondrial antibodies and other features resembling primary  
24 biliary cirrhosis. *Gastroenterology* 2008;134:1482-93.

- 25 8. Uriarte I, Banales JM, Saez E, et al. Bicarbonate secretion of mouse  
26 cholangiocytes involves Na(+)-HCO(3)(-) cotransport in addition to  
27 Na(+)-independent Cl(-)/HCO(3)(-) exchange. Hepatology  
28 2010;51:891-902.
- 29 9. Vroman B, LaRusso NF. Development and characterization of  
30 polarized primary cultures of rat intrahepatic bile duct epithelial cells.  
31 Lab Invest 1996;74:303-13.



# Supplementary tables

## Supplementary Table 1. Formulation of standard and modified HBSS

| Concentration (mM)               | Standard HBSS | Bicarbonate-free HBSS | Normal HBSS for 5% CO <sub>2</sub> | Chloride-free HBSS for 5% CO <sub>2</sub> |
|----------------------------------|---------------|-----------------------|------------------------------------|-------------------------------------------|
| NaCl                             | 136.89        | 141.34                | 119.78                             | —                                         |
| Na gluconate                     | —             | —                     | —                                  | 119.88                                    |
| CaCl <sub>2</sub>                | 1.27          | 1.27                  | 1.27                               | —                                         |
| Ca gluconate                     | —             | —                     | —                                  | 1.27                                      |
| KCl                              | 5.37          | 5.37                  | 5.37                               | —                                         |
| K gluconate                      | —             | —                     | —                                  | 5.37                                      |
| KH <sub>2</sub> PO <sub>4</sub>  | 0.44          | 0.44                  | 0.44                               | 0.44                                      |
| Na <sub>2</sub> HPO <sub>4</sub> | 0.34          | 0.34                  | 0.34                               | 0.34                                      |
| MgSO <sub>4</sub>                | 0.81          | 0.81                  | 0.81                               | 0.81                                      |
| NaHCO <sub>3</sub>               | 4.17          | —                     | 21.43                              | 21.43                                     |
| Glucose                          | 5.55          | 5.55                  | 5.55                               | 5.55                                      |
| HEPES-NaOH, pH 7.4               | 20            | 20                    | 20                                 | 20                                        |

## Supplementary Table 2. Oligo sequences for Tet-pLKO-puro cloning (5'→3')

| Target                   |                  | Oligo Sequences†                                                                 |
|--------------------------|------------------|----------------------------------------------------------------------------------|
| Short hairpin control    | <i>Sense</i>     | <b>CCGGCAACAAGATGAAGAGCACCAA</b> <u>CTCGAGTTGGTGCTTTCATCTTGTTG</u> <i>TTTTT</i>  |
|                          | <i>Antisense</i> | <u>AATTAAAAACAACAAGATGAAGAGCACCAA</u> <u>CTCGAGTTGGTGCTTTCATCTTGTTG</u>          |
| Soluble adenylyl cyclase | <i>Sense</i>     | <b>CCGGGAATGTGCTATGGATATATTT</b> <u>CTCGAGAAATATATCCATAGCACATTC</u> <i>TTTTT</i> |
|                          | <i>Antisense</i> | <u>AATTAAAAAGAATGTGCTATGGATATATTT</u> <u>CTCGAGAAATATATCCATAGCACATTC</u>         |

† Sequence annotations: **bolded**, target sequence; underlined, *AgeI* site; double underlined, *EcoRI* site; dotted line, hairpin loop with *XhoI* restriction site;

*italicized*, termination signal.

Supplementary Table 3. Primers for reverse transcription and RT-qPCR (5'→3')

| Target      | Primer for reverse transcription | Forward Primer for RT-qPCR | Reverse Primer for RT-qPCR |
|-------------|----------------------------------|----------------------------|----------------------------|
| <i>sAC</i>  | ATCTGCAACACCTTTCATAA             | GCTCTCAAGTCCACAAAATCCAAAC  | CCAATGACTGTGTACTCGTGTCTC   |
| <i>AE2</i>  | GACATAATCAGCTCCGACAC             | ACCCTCATGTCAGACAAGCAA      | TCCTCTCGCTTCTTGAGCATC      |
| <i>MCU</i>  | GCTCCATGATGTCCCAGGAA             | CCTGTGATATCTGTGAGGCTACC    | GCGAACACCATCTGGTGAATAG     |
| <i>36B4</i> | TAATCCGTCTCCACAGACAA             | TGTGGGAGCAGACAATGTGG       | TGAGGCAGCAGTTTCTCCAG       |

## Supplementary Table 4. Primary antibodies used in immunoblotting

| Primary antibody            | Company                                                                                         | Catalog No. | Dilution |
|-----------------------------|-------------------------------------------------------------------------------------------------|-------------|----------|
| Anti-sAC (R21)              | Gift from prof. Lonny Levin and Prof. Jochen Buck,<br>Weill Medical College, Cornell University |             | 1:3000   |
| Anti-AE2 (N-12)             | Santa Cruz                                                                                      | sc-46710    | 1:200    |
| Anti-ATP1A1                 | Gift from Dr. Jan B. Koenderink                                                                 |             | 1:1000   |
| Anti-MCU                    | Sigma                                                                                           | HPA016480   | 1:500    |
| Anti- $\beta$ -Actin        | Sigma                                                                                           | A5441       | 1:5000   |
| Anti-PARP                   | Roche                                                                                           | 11835238001 | 1:2000   |
| Anti-cleaved caspase 3      | Cell Signaling                                                                                  | #9661       | 1:1000   |
| Anti-JNK                    | Cell Signaling                                                                                  | #9252       | 1:1000   |
| Anti-pJNK (Thr183 / Tyr185) | Cell Signaling                                                                                  | #4668       | 1:1000   |
| Anti-Mcl-1 (S-19)           | Santa Cruz                                                                                      | sc-819      | 1:500    |
| Anti-Bax                    | Cell Signaling                                                                                  | #2772       | 1:1000   |
| Anti-pBax (Thr167)          | Assay Biotech                                                                                   | A0733       | 1:500    |

# Supplementary figure legends

## **Figure S1. sAC accounted for a significant portion of total cAMP pool in**

**H69 cholangiocytes.** The total cellular cAMP pool consists of the

sAC-dependent cAMP pool and various tmAC-dependent pools. To distinguish

sAC-dependent cAMP pool in H69 cholangiocytes from those of tmACs, cAMP

accumulation assay was performed in the absence or presence of

sAC-specific inhibitor KH7. Cells were pretreated with 0.2% DMSO or 100 $\mu$ M

KH7 for 5 minutes. Accumulation of cAMP was initiated by the addition of

500 $\mu$ M IBMX and stopped after 1, 2 and 5 minutes. The amount of

accumulated cAMP was determined by ELISA. Baseline total cAMP assayed

before the addition of IBMX lies about the detection limit (dashed line) of the

assay as a result of breakdown by phosphodiesterases. A representative

duplicate assay is shown. Two-tailed Student's t-test, \*  $P < .05$ ; \*\*  $P \leq .01$ .

## **Figure S2. Removal of extracellular chloride resulted in intracellular**

**alkalinization in H69 human cholangiocytes.** Intracellular pH was measured

with pH probe BCECF under 5% CO<sub>2</sub> at 37°C as described in Supplementary

Method. After baseline intracellular pH was stable, extracellular chloride was replaced with gluconate. Average of triplicate assay with standard deviation is shown.

**Figure S3. sAC-specific inhibitor KH7 reduced total cellular cAMP during**

**BSIA.** Confluent H69 monolayers were pre-incubated with 750 $\mu$ M NaCDC in the presence or absence of 100 $\mu$ M KH7 in 5% CO<sub>2</sub>, 37°C incubator for 10 minutes before addition of 500 $\mu$ M IBMX. cAMP was accumulated for 2 minutes.

A representative triplicate assay was shown. Two-tailed Student's t-test, \*\*  $P \leq .01$ .

**Figure S4. sAC-specific inhibitor KH7 did not cause acute cytotoxicity in**

**H69 cholangiocytes.** H69 cholangiocytes were incubated with 0, 50, 100 $\mu$ M KH7 for 1 hour. WST-1 conversion rate was measured as a viability index.

One-way ANOVA,  $p=0.0714$ .

**Figure S5. sAC-specific inhibitor KH7 did not affect bile salt uptake by**

**H69 human cholangiocytes.** Confluent H69 human cholangiocyte

monolayers were incubated with 2.87kBq 22,23-<sup>3</sup>H-glycochenodeoxycholate and 750μM sodium glycochenodeoxycholate in bicarbonate-free HBSS at 37°C in ambient air. After 0.25, 1, 4, and 16 minutes, cells were washed twice with ice-cold bicarbonate-free HBSS and lysed in RIPA buffer. Radioactivity of cell lysates was determined by liquid scintillation counter. Results were normalized to input.

**Figure S6. Bile salt-induced apoptotic membrane blebbing was**

**prevented by sAC inhibition.** H69 cholangiocytes were treated with combination of 750μM NaCDC and 100μM KH7 for 1 hour in 5% CO<sub>2</sub>, 37°C incubator. Cells were fixed with 4% paraformaldehyde and apoptotic membrane blebbing was examined by phase contrast microscope.

**Figure S7. Increasing intracellular free Ca<sup>2+</sup> by ionomycin did not**

**induced apoptosis in H69 human cholangiocytes.** H69 human cholangiocyte monolayers were treated with 750μM NaCDC, 1μM and 2μM ionomycin for 1 hour in 5% CO<sub>2</sub>, 37°C incubator. Caspase 3/7 activity was

determined. Shown here average of a triplicate assay. Results were normalized to the vehicle-treated group. ~~Two-tailed Student's t-test (compared with vehicle-treated group), \*\*\*  $P \leq .001$ ; n.s. not significant.~~ ~~Two-tailed Student's t-test (compared with vehicle-treated group), \*\*\*  $P \leq .001$ ; n.s. not significant.~~
